# Supplementary material for: An Autochthonous Susceptible Candida auris Clade I Otomycosis Case in Iran
Source: MDPI journal article supplement (doi:10.3390/jof9111101), 2023-11-11
Supplement: s1 [file s1]

**Supplementary Table 1.**

| <b>ID</b>   | <b>SRA accession number</b> | <b>Country</b> | <b>Clade</b> |
|-------------|-----------------------------|----------------|--------------|
| B11203      | SRR1452434                  | India          | I            |
| B11205      | SRR3883436                  | India          | I            |
| B11209      | SRR3883441                  | India          | I            |
| B11213      | SRR3883444                  | India          | I            |
| WM-18.173   | SRR11485330                 | India          | I            |
| B11808      | SRR10461263                 | South Korea    | II           |
| B13463      | SRR10461159                 | Canada         | II           |
| B14308      | SRR10461147                 | USA            | II           |
| B11225      | SRR3883457                  | South Africa   | III          |
| B11229      | SRR3883462                  | South Africa   | III          |
| B11230      | SRR3883463                  | South Africa   | III          |
| B12037      | SRR10461253                 | Canada         | III          |
| B12098      | SRR10461248                 | Panama         | IV           |
| B12177      | SRR10461201                 | Venezuela      | IV           |
| B12336      | SRR7140028                  | Colombia       | IV           |
| B12388      | SRR7909221                  | USA            | IV           |
| MRL40       | SRR18325430                 | Iran           | V            |
| TMML616     | SRR18325431                 | Iran           | V            |
| IFRC2087    | SRR9007776                  | Iran           | V            |
| F0083       | SRR*                        | Singapore      | VI           |
| F1580       | SRR*                        | Singapore      | VI           |
| F3485       | SRR*                        | Singapore      | VI           |
| 102096/2021 | SRR24877249                 | Bangladesh     | VI           |

**SRA: sequence read archive. \* submitted**
